# Supplementary material for: The Distribution of Circulating Tumor Cells Is Different in Metastatic Lobular Compared to Ductal Carcinoma of the Breast—Long-Term Prognostic Significance
Source: MDPI journal article supplement (doi:10.3390/cells9071718), 2020-07-17

## Supplementary material 7

Progression-free survival (PFS) by CA 15-3 cut-off  $\geq 30$   
in invasive lobular carcinoma (ILC) ( $P=0.91$ )

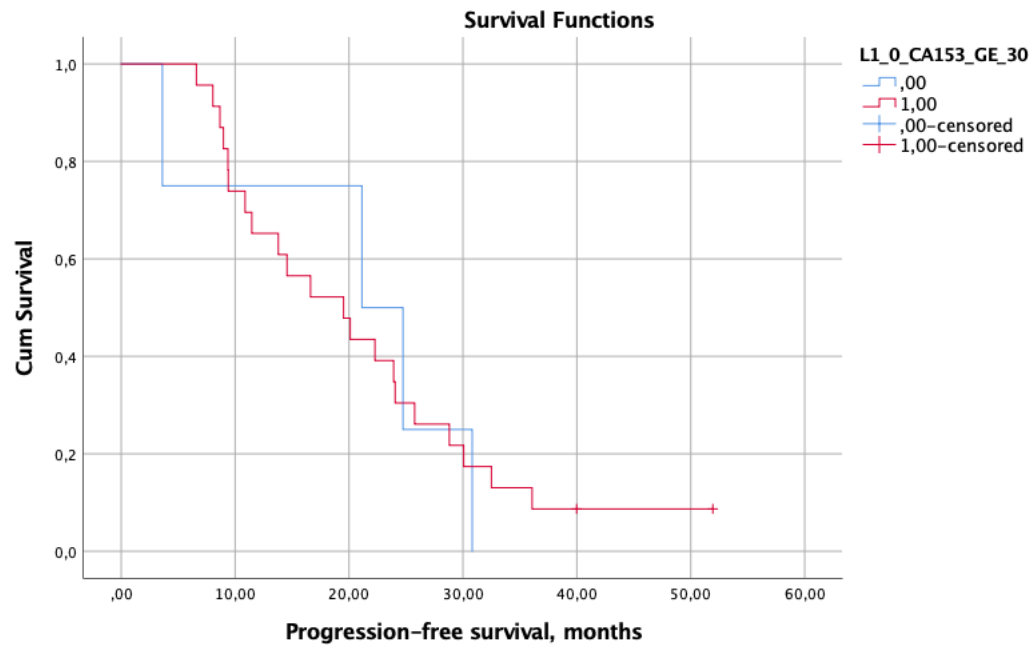

Overall survival (OS) by CA 15-3 cut-off  $\geq 30$  in ILC ( $P=0.28$ )

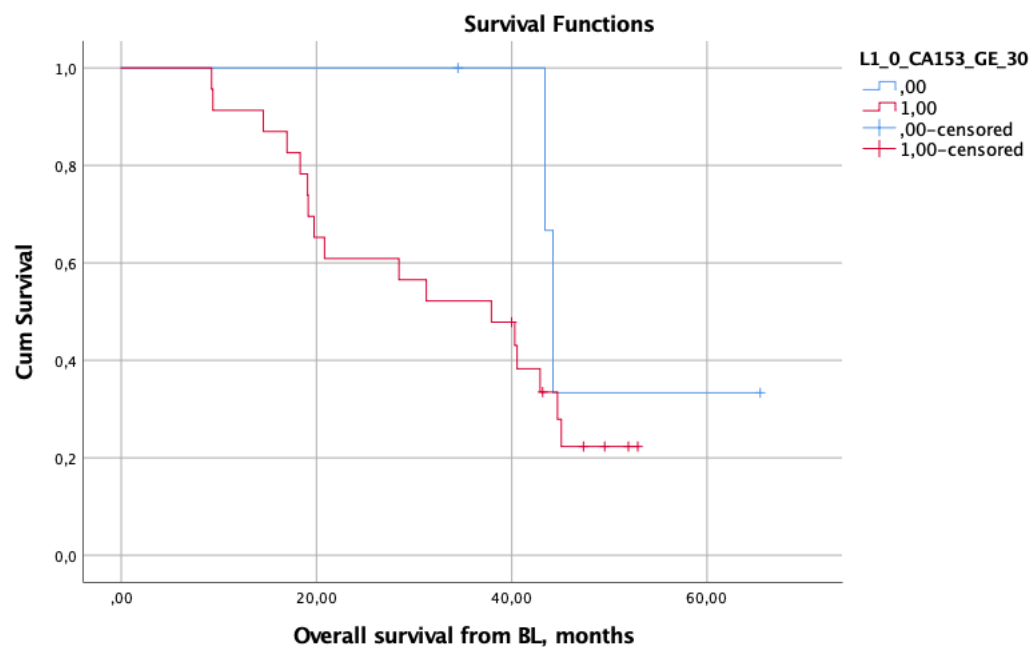

PFS by CA 15-3 cut-off  $\geq 100$  in ILC ( $P=0.46$ )

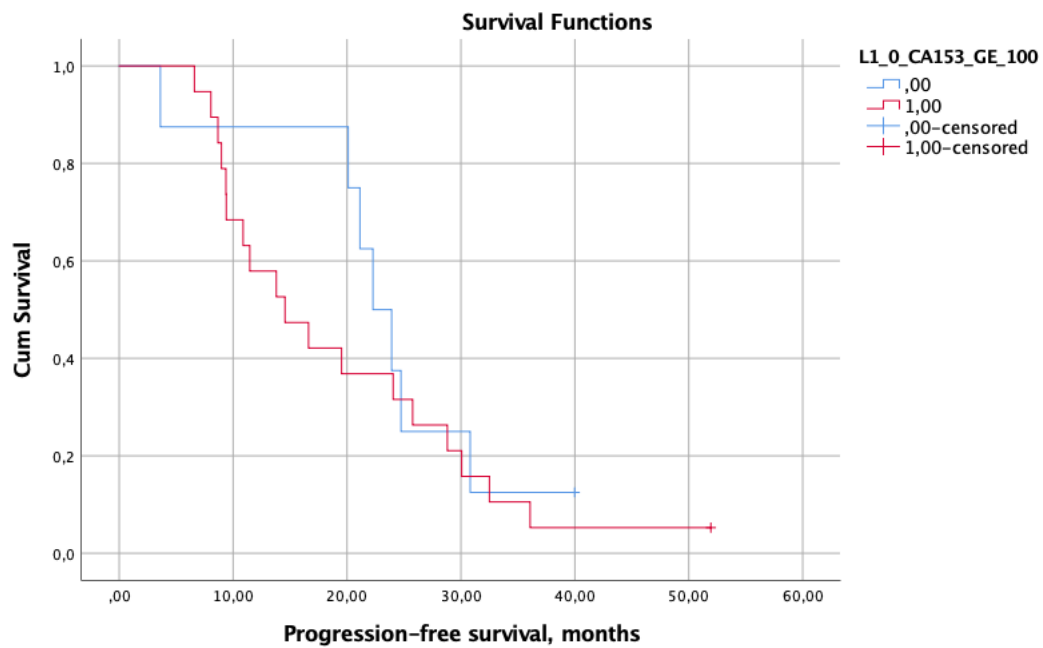

OS by CA 15-3 cut-off  $\geq 100$  in ILC ( $P=0.03$ )

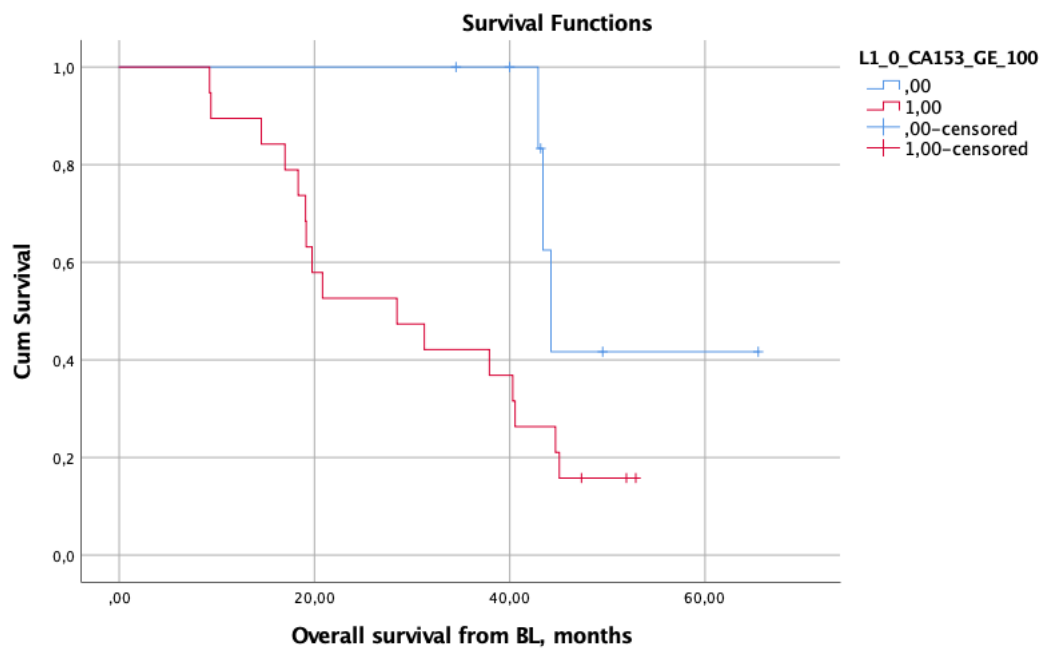

PFS by CA 15-3 cut-off  $\geq 200$  in ILC ( $P=0.44$ )

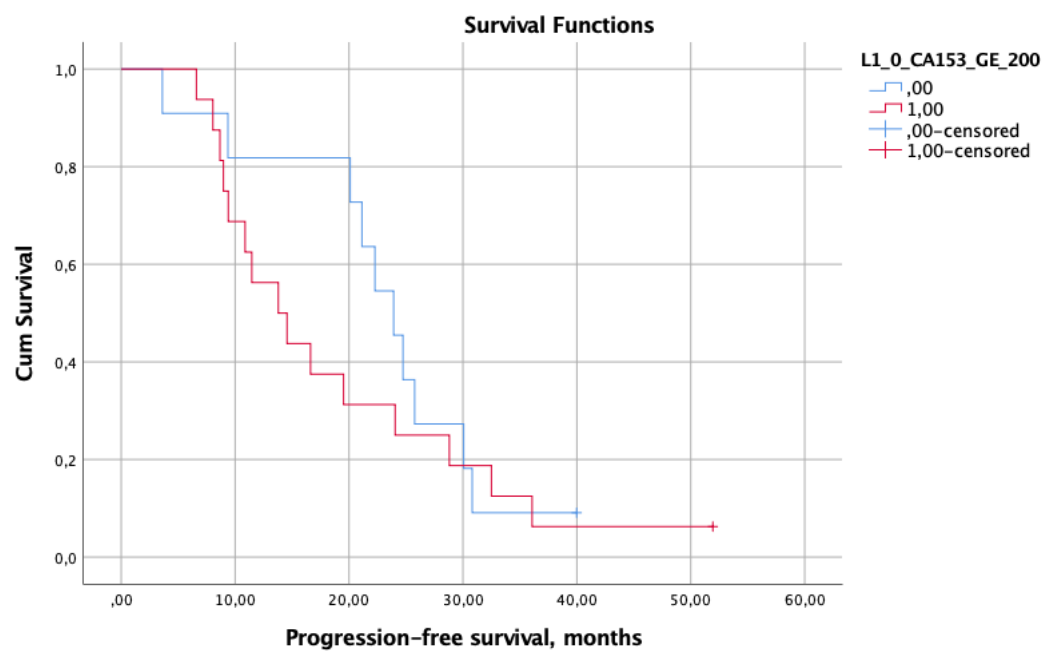

OS by CA 15-3 cut-off  $\geq 200$  in ILC ( $P=0.01$ )

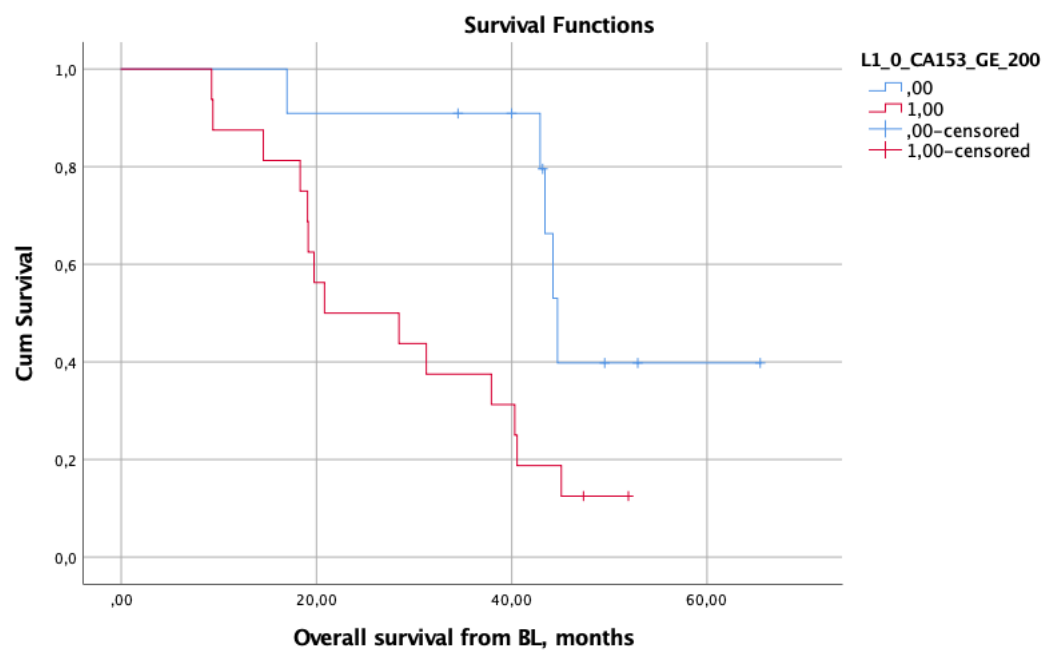

PFS by CA 15-3 cut-off  $\geq 400$  in ILC ( $P=0.27$ )

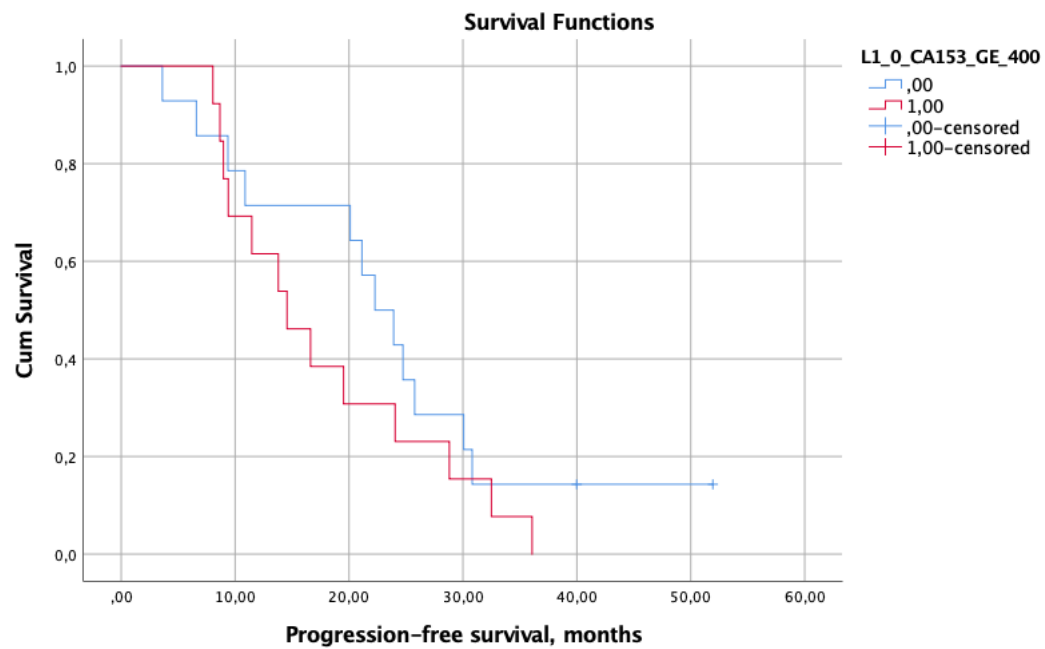

OS by CA 15-3 cut-off  $\geq 400$  in ILC ( $P=0.01$ )

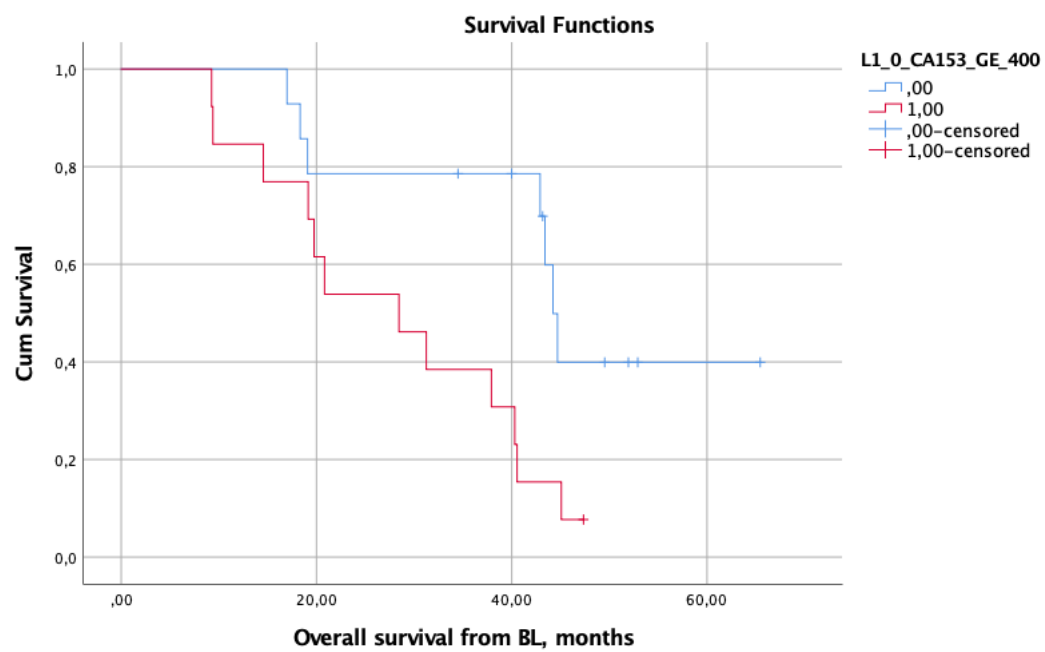

PFS by CA15-3 cut-off  $\geq 30$  in invasive ductal carcinoma  
of no special type (NST) ( $P=0.26$ )

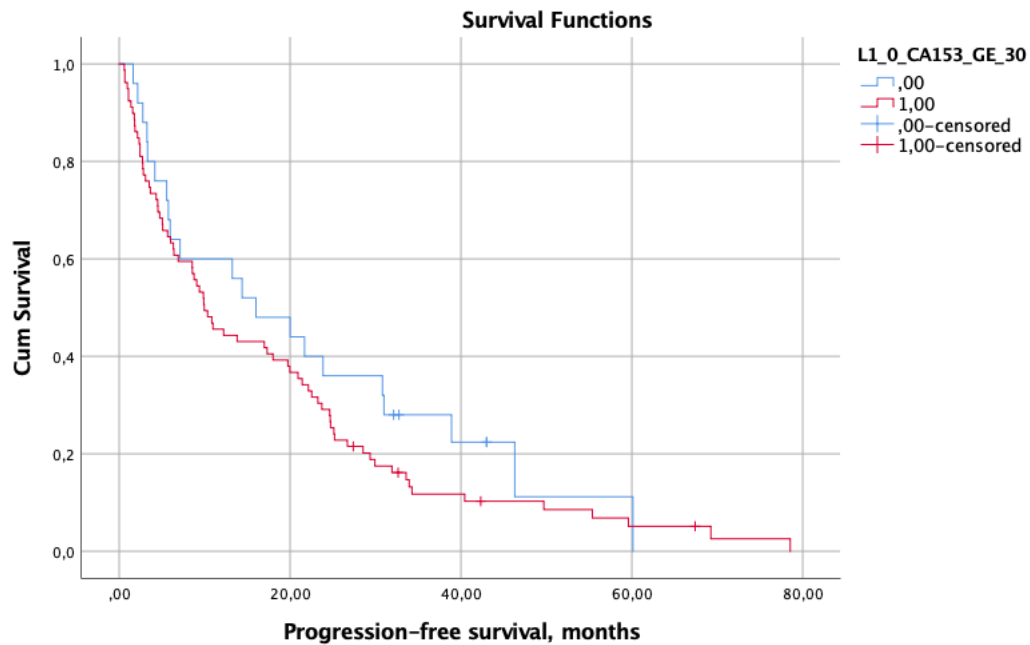

OS by CA 15-3 cut-off  $\geq 30$  in NST ( $P=0.14$ )

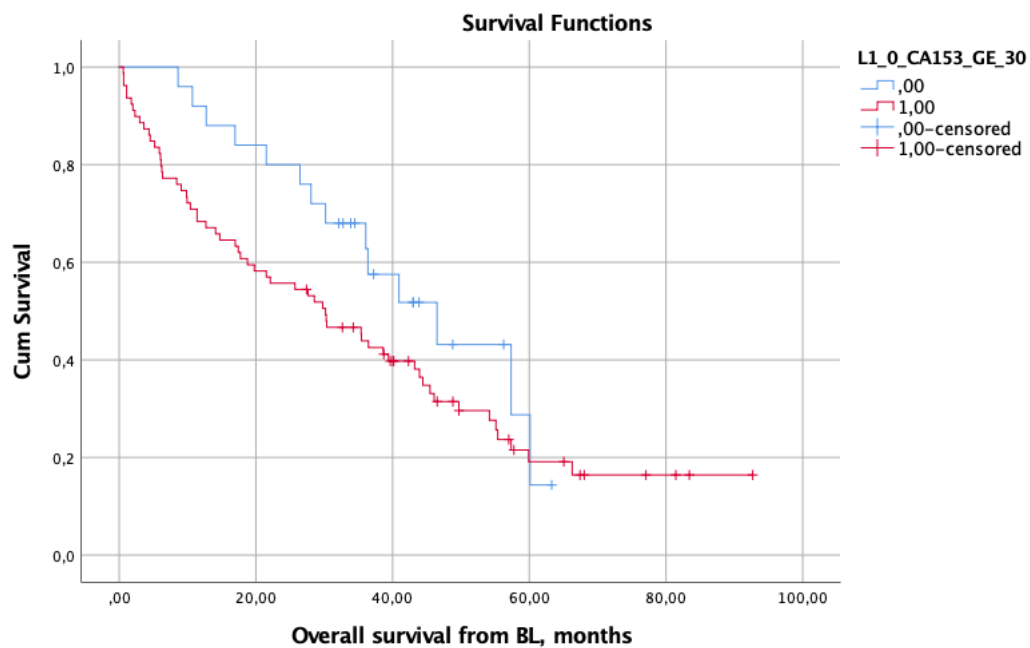

PFS by CA 15-3 cut-off  $\geq 100$  in NST ( $P=0.03$ )

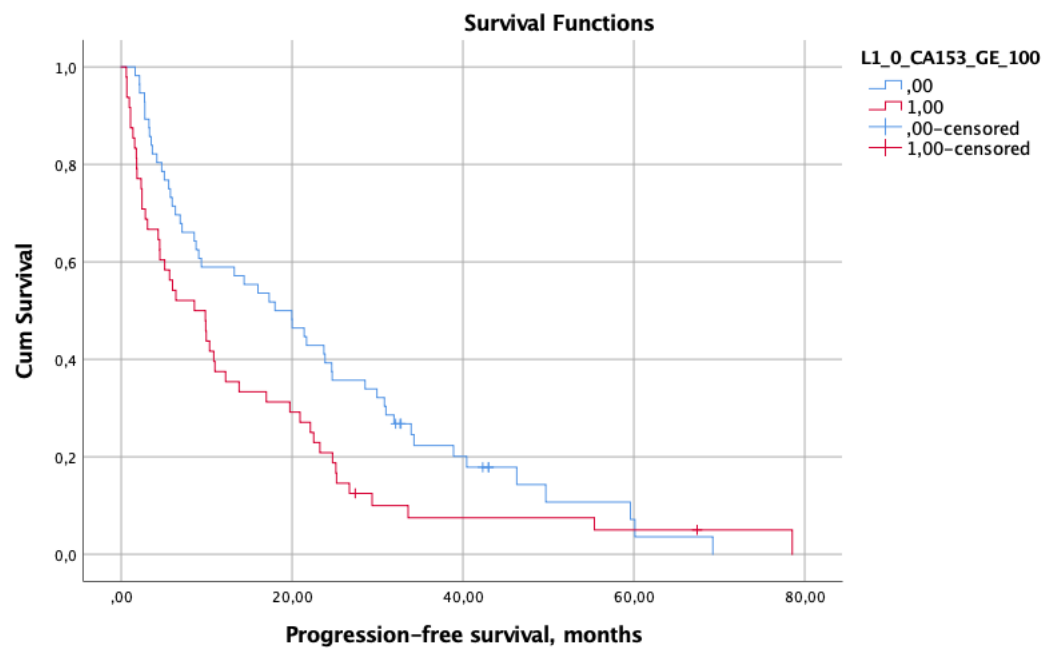

OS by CA 15-3 cut-off  $\geq 100$  in NST ( $P<0.001$ )

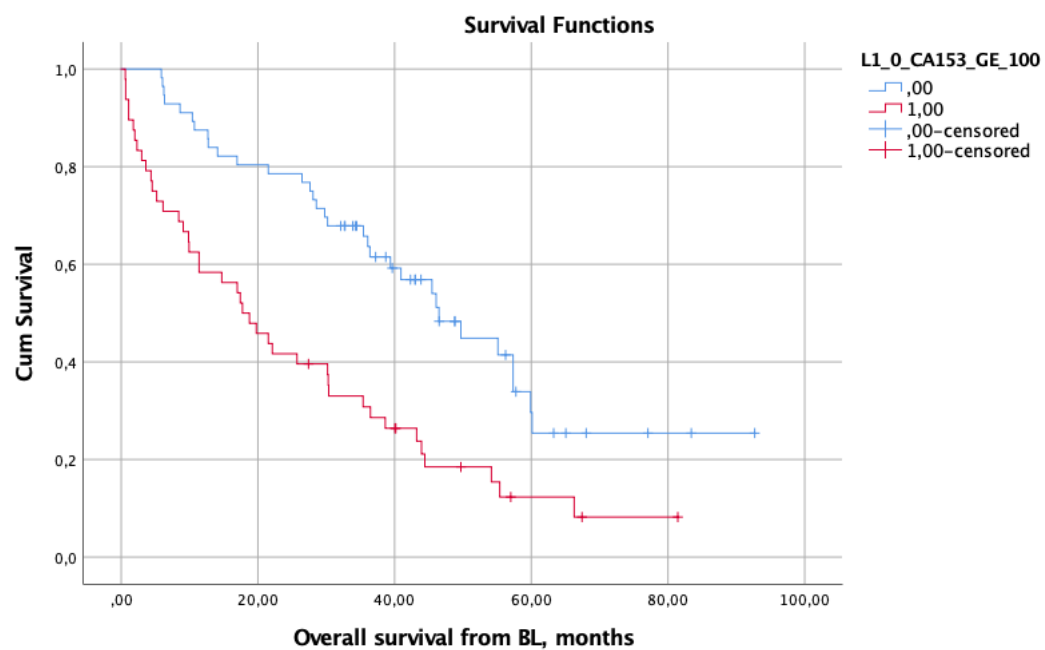

PFS by CA 15-3 cut-off  $\geq 200$  in NST ( $P=0.35$ )

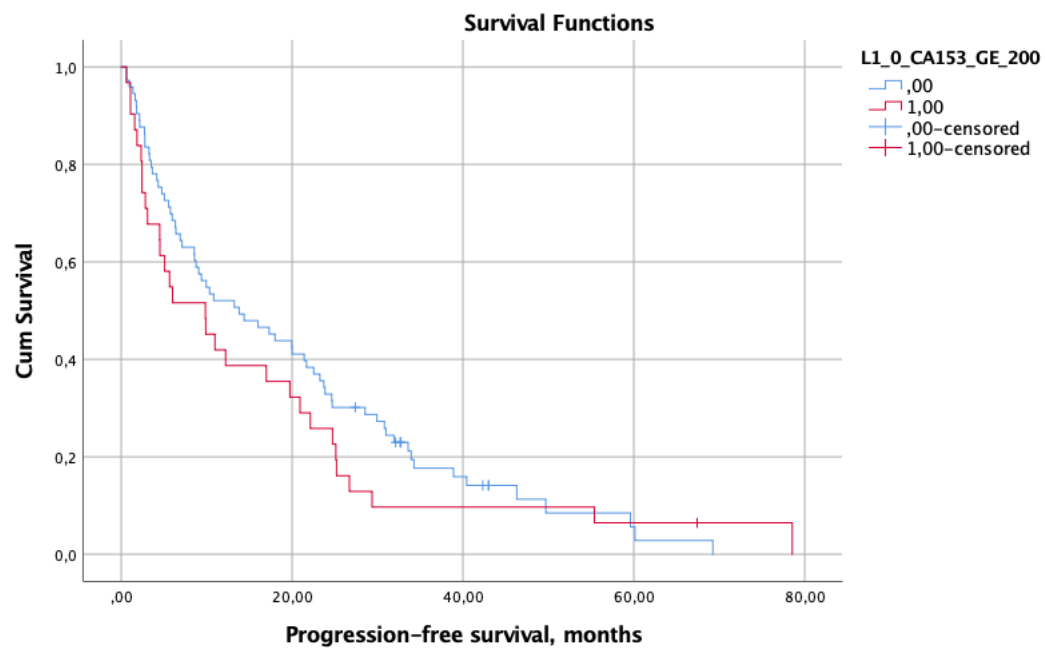

OS by CA 15-3 cut-off  $\geq 200$  in NST ( $P=0.01$ )

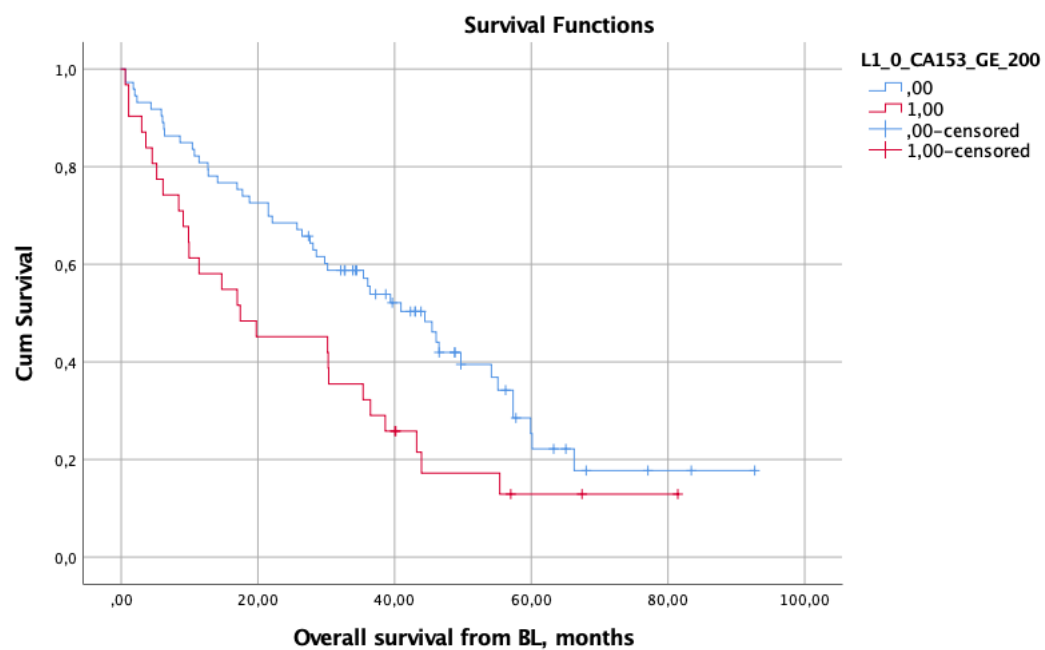

PFS by CA 15-3 cut-off  $\geq 400$  in NST ( $P=0.22$ )

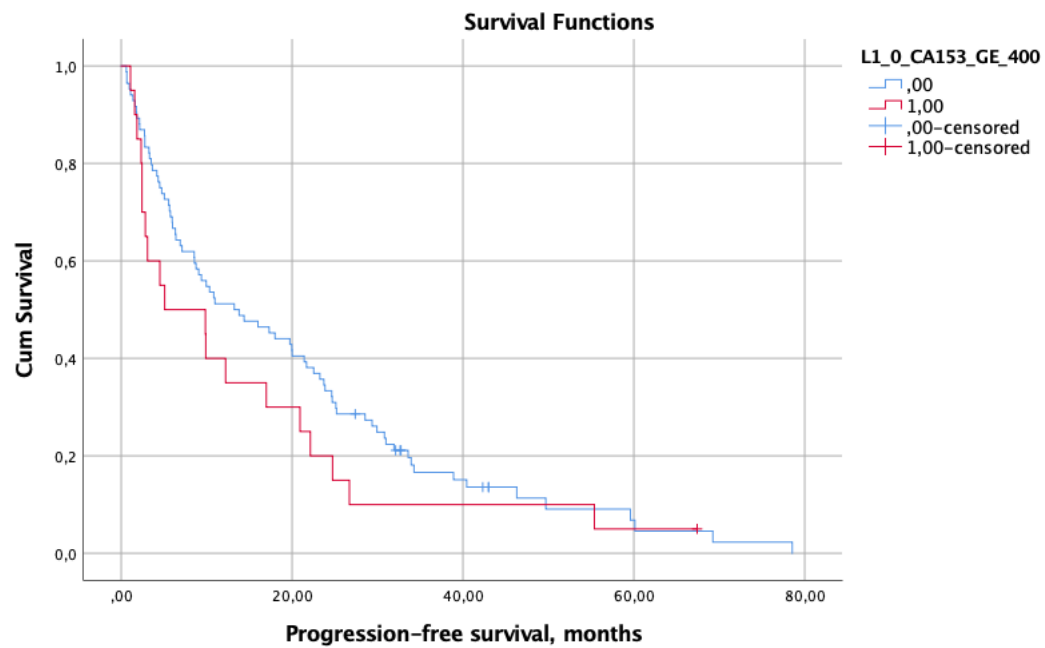

OS by CA 15-3 cut-off  $\geq 400$  in NST ( $P=0.01$ )

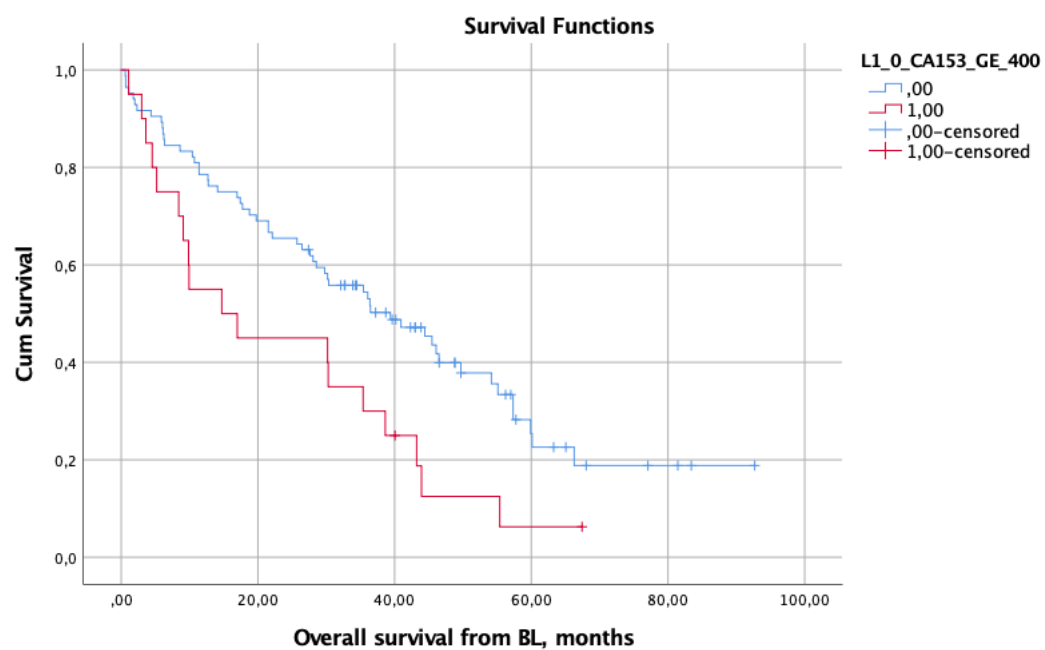

Supplement: s1 [file s1]
