# Supplementary material for: The Distribution of Circulating Tumor Cells Is Different in Metastatic Lobular Compared to Ductal Carcinoma of the Breast—Long-Term Prognostic Significance
Source: MDPI journal article supplement (doi:10.3390/cells9071718), 2020-07-17
Supplement: s1 [file s1]

# OS from 3 months by CTC count

## ILC

Cut-off  $\geq 5$  CTCs at BL and 3 months

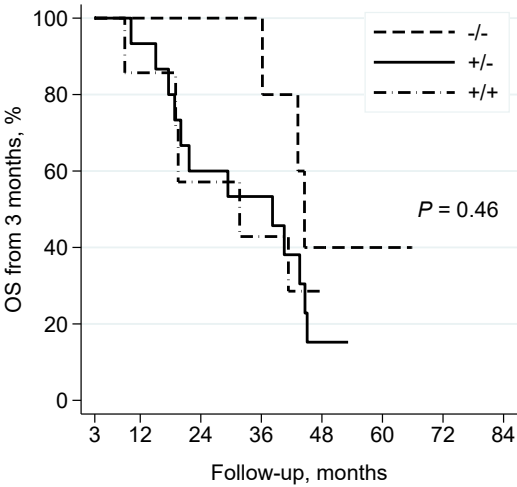

Number at risk

|     |    |    |   |   |   |   |   |   |
|-----|----|----|---|---|---|---|---|---|
| -/- | 5  | 5  | 5 | 5 | 2 | 1 | 0 | 0 |
| +/- | 15 | 14 | 9 | 7 | 2 | 0 | 0 | 0 |
| +/+ | 7  | 6  | 4 | 3 | 0 | 0 | 0 | 0 |

## NST

Cut-off  $\geq 5$  CTCs at BL and 3 months

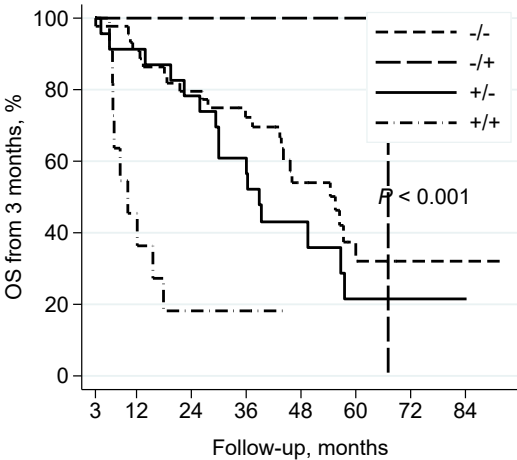

Number at risk

|     |    |    |    |    |    |   |   |   |
|-----|----|----|----|----|----|---|---|---|
| -/- | 44 | 40 | 35 | 27 | 16 | 7 | 2 | 1 |
| -/+ | 1  | 1  | 1  | 1  | 1  | 1 | 0 | 0 |
| +/- | 23 | 21 | 18 | 14 | 7  | 3 | 2 | 1 |
| +/+ | 11 | 5  | 2  | 2  | 0  | 0 | 0 | 0 |

Cut-off  $\geq 20$  CTCs at BL and 3 months

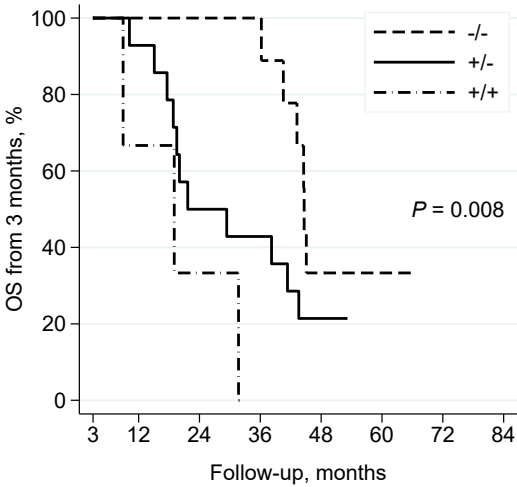

Number at risk

|     |    |    |    |   |   |   |   |   |
|-----|----|----|----|---|---|---|---|---|
| -/- | 10 | 10 | 10 | 9 | 3 | 1 | 0 | 0 |
| +/- | 14 | 13 | 7  | 6 | 1 | 0 | 0 | 0 |
| +/+ | 3  | 2  | 1  | 0 | 0 | 0 | 0 | 0 |

Cut-off  $\geq 20$  CTCs at BL and 3 months

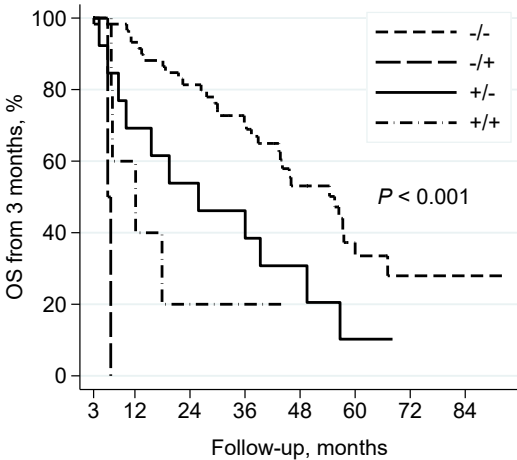

Number at risk

|     |    |    |    |    |    |    |   |   |
|-----|----|----|----|----|----|----|---|---|
| -/- | 59 | 55 | 48 | 37 | 21 | 10 | 4 | 2 |
| -/+ | 2  | 0  | 0  | 0  | 0  | 0  | 0 | 0 |
| +/- | 13 | 9  | 7  | 6  | 3  | 1  | 0 | 0 |
| +/+ | 5  | 3  | 1  | 1  | 0  | 0  | 0 | 0 |

Cut-off  $\geq 80$  CTCs at BL and 3 months

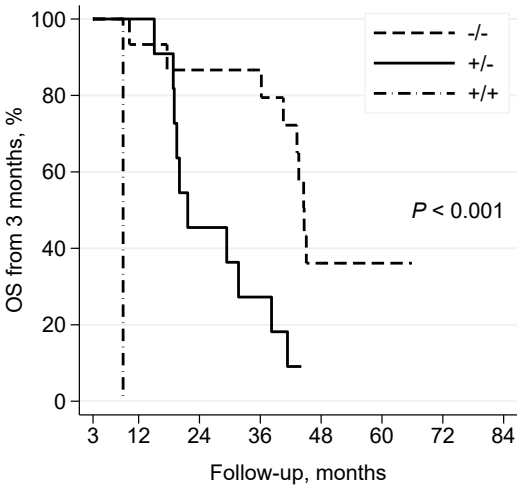

Number at risk

|     |    |    |    |    |   |   |   |   |
|-----|----|----|----|----|---|---|---|---|
| -/- | 15 | 14 | 13 | 12 | 4 | 1 | 0 | 0 |
| +/- | 11 | 11 | 5  | 3  | 0 | 0 | 0 | 0 |
| +/+ | 1  | 0  | 0  | 0  | 0 | 0 | 0 | 0 |

Cut-off  $\geq 80$  CTCs at BL and 3 months

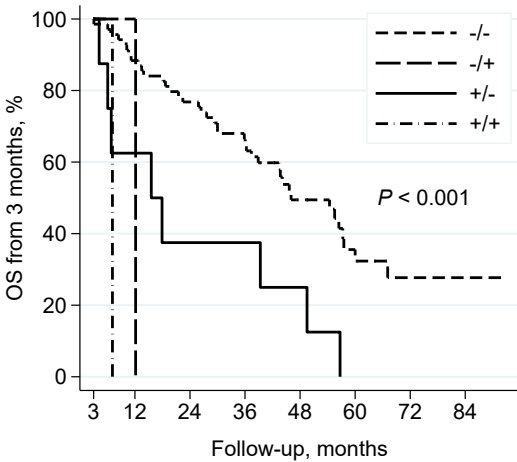

Number at risk

|     |    |    |    |    |    |    |   |   |
|-----|----|----|----|----|----|----|---|---|
| -/- | 69 | 61 | 53 | 41 | 22 | 11 | 4 | 2 |
| -/+ | 1  | 1  | 0  | 0  | 0  | 0  | 0 | 0 |
| +/- | 8  | 5  | 3  | 3  | 2  | 0  | 0 | 0 |
| +/+ | 1  | 0  | 0  | 0  | 0  | 0  | 0 | 0 |
