# Supplementary material for: The Distribution of Circulating Tumor Cells Is Different in Metastatic Lobular Compared to Ductal Carcinoma of the Breast—Long-Term Prognostic Significance
Source: MDPI journal article supplement (doi:10.3390/cells9071718), 2020-07-17

# PFS from 3 months by CTC count

ILC

Cut-off  $\geq 5$  CTCs at BL and 3 months

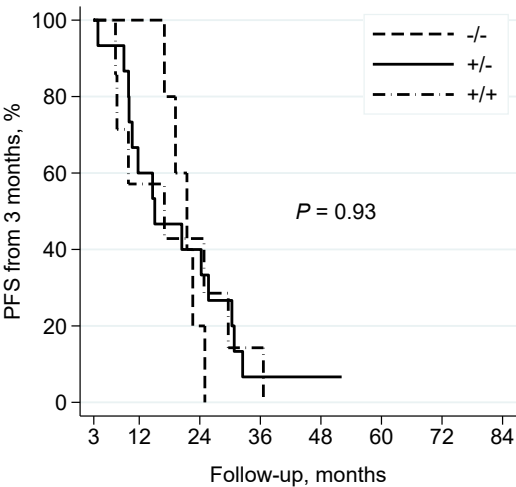

NST

Cut-off  $\geq 5$  CTCs at BL and 3 months

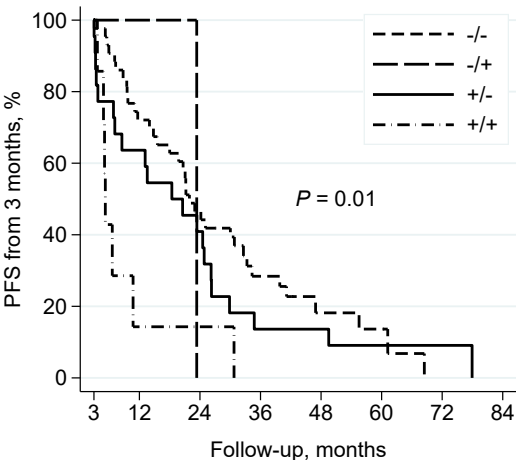

Cut-off  $\geq 20$  CTCs at BL and 3 months

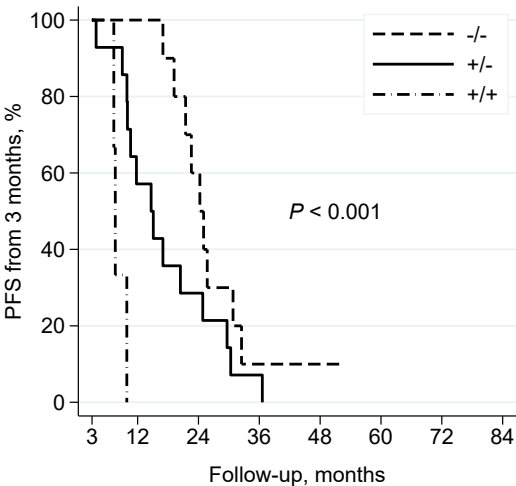

Cut-off  $\geq 20$  CTCs at BL and 3 months

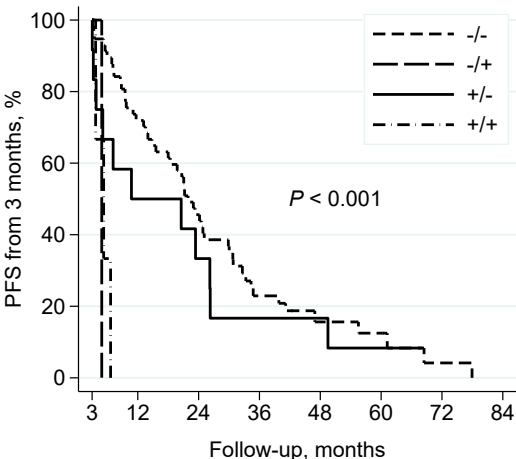

Cut-off  $\geq 80$  CTCs at BL and 3 months

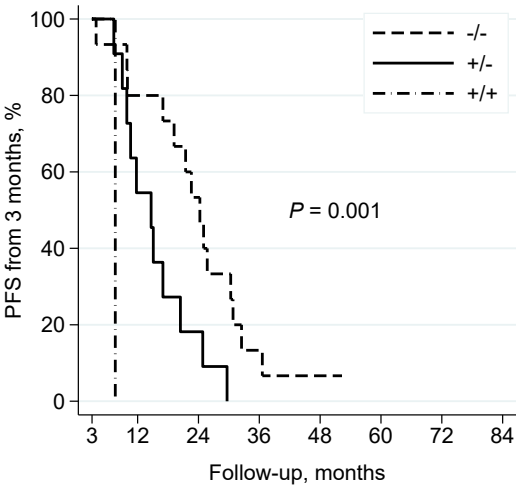

Cut-off  $\geq 80$  CTCs at BL and 3 months

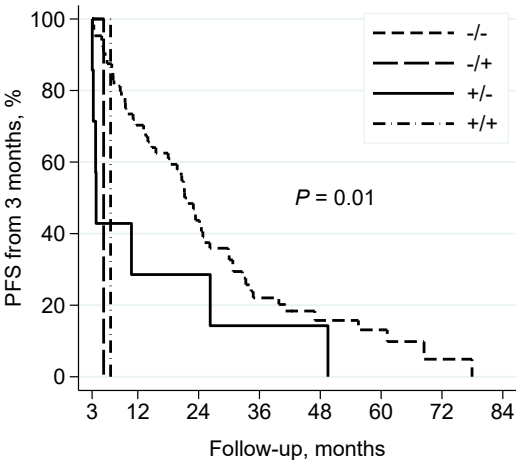

Supplement: s1 [file s1]
