# Supplementary material for: The Distribution of Circulating Tumor Cells Is Different in Metastatic Lobular Compared to Ductal Carcinoma of the Breast—Long-Term Prognostic Significance
Source: Cells. 2020 Jul 17;9(7):1718. doi: 10.3390/cells9071718 (PMC7407940; doi:10.3390/cells9071718)
Supplement: Supplementary file 1 [file cells-09-01718-s001.zip]

Archive with 8 entries (8 files):
- suppl Figure S2.pdf
- suppl Table S1.docx
- suppl Figure S3.pdf
- suppl Figure S4.pdf
- suppl Figure S5.pdf
- suppl Figure S6.pdf
- suppl Figure S7.pdf
- suppl Figure S1.tif
